# Supplementary material for: Validation Activities of Aeolus Wind Products in the Southeastern Iberian Peninsula
Source: Copernicus journal article supplement (doi:10.5194/acp-2022-732), 2022-10-28
Supplement: Supplementary file [file acp-2022-732-AC1-supplement.pdf]

Dear reviewers and editor:

We would like to thank you for taking the time to review our manuscript and suggest such valuable information in order to improve its quality. Even the most trivial suggestion helped in the progress of the text's value.

A set of minor changes and typos has been corrected throughout the document. Following this introduction, you may find a detailed answer to Ajil Kottayil's comment. All of the changes can be seen in the new version of the manuscript, marked in red.

## **Ajil Kottayil**

- 1) *Please consider citing our recent work on Aeolus validation ove the tropics which may help to intepret the results better.*

We appreciate this comment, as it helps to increase the bibliography of the article. Following Ajil Kottayil's suggestion, the mentioned article has been cited in the introduction in line 53.
